# Supplementary material for: Clinical outcomes of bronchiectasis in India: data from the EMBARC/Respiratory Research Network of India registry
Source: PubMed Central journal article supplement — Eur Respir J. 2023 Jan 5;61(1):2200611. doi: 10.1183/13993003.00611-2022 (PMC9816417; doi:10.1183/13993003.00611-2022), 2023-01-05
Supplement: ERJ-00611-2022.Shareable.pdf [file ERJ-00611-2022.Shareable.pdf]

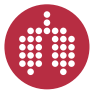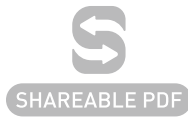

# Clinical outcomes of bronchiectasis in India: data from the EMBARC/Respiratory Research Network of India registry

Raja Dhar<sup>1</sup>, Sheetu Singh<sup>2</sup>, Deepak Talwar<sup>3</sup>, B.V. Murali Mohan<sup>4</sup>, Surya Kant Tripathi<sup>5</sup>, Rajesh Swarnakar<sup>6</sup>, Sonali Trivedi<sup>7</sup>, Srinivas Rajagopala<sup>8</sup>, George D'Souza<sup>9</sup>, Arjun Padmanabhan<sup>10</sup>, B. Archana<sup>11</sup>, P.A. Mahesh<sup>12</sup>, Babaji Ghewade<sup>13</sup>, Girija Nair<sup>14</sup>, Aditya Jindal<sup>15</sup>, Gayathri Devi H. Jayadevappa<sup>16</sup>, Honney Sawhney<sup>17</sup>, Kripesh Ranjan Sarmah<sup>18</sup>, Kaushik Saha<sup>19</sup>, Suresh Anantharaj<sup>20</sup>, Arjun Khanna<sup>21</sup>, Samir Gami<sup>22</sup>, Arti Shah<sup>23</sup>, Arpan Shah<sup>24</sup>, Naveen Dutt<sup>25</sup>, Himanshu Garg<sup>26</sup>, Sunil Vyas<sup>27</sup>, Kummannoor Venugopal<sup>28</sup>, Rajendra Prasad<sup>29</sup>, Naveed M. Aleemuddin<sup>30</sup>, Saurabh Karmakar<sup>31</sup>, Virendra Singh<sup>32</sup>, S.K. Jindal<sup>15</sup>, Shubham Sharma<sup>1</sup>, Deepak Prajapat<sup>3</sup>, Sagar Chandrashekar<sup>4</sup>, Michael Loebinger<sup>33</sup>, Aditi Mishra<sup>6</sup>, Francesco Blasi<sup>34</sup>, Ramanathan Palaniappan Ramanathan<sup>8</sup>, Pieter C. Goeminne<sup>35</sup>, Preethi Vasudev<sup>10</sup>, Amelia Shoemark<sup>36</sup>, B.S. Jayaraj<sup>12</sup>, Rahul Kungwani<sup>13</sup>, Akanksha Das<sup>14</sup>, Mehneet Sawhney<sup>17</sup>, Eva Polverino<sup>37</sup>, Tobias Welte<sup>38</sup>, Nayan Sri Gulecha<sup>20</sup>, Michal Shteinberg<sup>39</sup>, Anshul Mangala<sup>23</sup>, Palak Shah<sup>24</sup>, Nishant Kumar Chauhan<sup>25</sup>, Nikita Jajodia<sup>26</sup>, Ashutosh Singhal<sup>27</sup>, Sakshi Batra<sup>29</sup>, Ashfaq Hasan<sup>30</sup>, Stefano Aliberti<sup>40</sup>, Megan L. Crichton<sup>36</sup>, Sneha Limaye<sup>41</sup>, Sundeep Salvi<sup>41</sup> and James D. Chalmers<sup>36</sup> for the EMBARC-India study group

<sup>1</sup>Fortis Hospital Kolkata, Kolkata, India. <sup>2</sup>Institute of Respiratory Disease, SMS Medical College, Jaipur, India. <sup>3</sup>Metro Centre for Respiratory Diseases, Noida, India. <sup>4</sup>Mazumdar Shaw Medical Centre, Narayana Hrudayalaya, Bangalore, India. <sup>5</sup>King George's Medical University, Uttar Pradesh, India. <sup>6</sup>Getwell Hospital and Research Centre, Nagpur, India. <sup>7</sup>Jawaharlal Nehru Hospital and Research Centre, Bhilai, India. <sup>8</sup>PSG Institute of Pulmonary Medicine, Coimbatore, India. <sup>9</sup>St John Medical College, Bengaluru, India. <sup>10</sup>Kerala Institute of Medical Sciences Trivandrum, Trivandrum, India. <sup>11</sup>Kempegowda Institute of Medical Sciences, Bengaluru, India. <sup>12</sup>JSS Medical College, JSSAHER, Mysuru, India. <sup>13</sup>Datta Meghe Institute of Medical Sciences Wardha, Wardha, India. <sup>14</sup>Department of Respiratory Medicine, D.Y. Patil School of Medicine, Navi Mumbai, India. <sup>15</sup>Jindal Clinics, Chandigarh, India. <sup>16</sup>MS Ramaiah Medical College, Bengaluru, India. <sup>17</sup>Government Multispecialty Hospital, Chandigarh, India. <sup>18</sup>Apollo Hospitals, Guwahati, India. <sup>19</sup>Burdwan Medical College, Burdwan, India. <sup>20</sup>Sundaram Medical Foundation and SRM Institute of Medical Sciences, Chennai, India. <sup>21</sup>Galaxy Hospital Delhi and Yashoda Super Speciality Hospital Kaushambi, Uttar Pradesh, India. <sup>22</sup>Unique Hospital Multispecialty and Research Centre, Surat, India. <sup>23</sup>Dhiraj Hospital, Sumandeep University, Gujarat, India. <sup>24</sup>Pranayam Lung and Heart Institute and Research Centre, Vadodara, India. <sup>25</sup>All India Institute of Medical Sciences, Jodhpur, India. <sup>26</sup>Artemis Hospitals, Gurgaon, India. <sup>27</sup>Dr SN Medical College, Jodhpur, India. <sup>28</sup>Government Medical College, Cherpulassery, India. <sup>29</sup>Era's Lucknow Medical College and Hospital, Era University, Lucknow, India. <sup>30</sup>Deccan College of Medical Sciences, Hyderabad, India. <sup>31</sup>All India Institute of Medical Sciences Patna, Bihar, India. <sup>32</sup>Asthma Bhawan, Jaipur, India. <sup>33</sup>Department of Respiratory Medicine, Royal Brompton Hospital, London, UK. <sup>34</sup>Department of Pathophysiology and Transplantation, University of Milan, Milan, Italy. <sup>35</sup>Department of Respiratory Medicine, AZ Nikolaas, Sint-Niklaas, Belgium. <sup>36</sup>Division of Molecular and Clinical Medicine, University of Dundee, Dundee, UK. <sup>37</sup>Pneumology Department, Hospital Universitari Vall d'Hebron (HUVH), Barcelona, Spain. <sup>38</sup>Department of Respiratory Medicine, Hannover Medical School, Hannover, Germany. <sup>39</sup>Pulmonary Institute, Carmel Medical Center, Haifa, Israel. <sup>40</sup>IRCCS Humanitas Research Hospital, Humanitas University, Milan, Italy. <sup>41</sup>Chest Research Foundation, Pune, India.

Corresponding author: James D. Chalmers ([jchalmers@dundee.ac.uk](mailto:jchalmers@dundee.ac.uk))

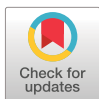

Shareable abstract (@ERSpublications)

**Long-term follow-up of patients in the Indian Bronchiectasis Registry identifies independent predictors of poor outcome including frequent exacerbations and chronic infection with Gram-negative pathogens such as *Klebsiella pneumoniae*** <https://bit.ly/3cWh1u7>

**Cite this article as:** Dhar R, Singh S, Talwar D, *et al.* Clinical outcomes of bronchiectasis in India: data from the EMBARC/Respiratory Research Network of India registry. *Eur Respir J* 2023; 61: 2200611 [DOI: 10.1183/13993003.00611-2022].

This single-page version can be shared freely online.

## Abstract

**Background** Identifying risk factors for poor outcomes can help with risk stratification and targeting of treatment. Risk factors for mortality and exacerbations have been identified in bronchiectasis but have been

Copyright ©The authors 2023.

This version is distributed under the terms of the Creative Commons Attribution Non-Commercial Licence 4.0. For commercial reproduction rights and permissions contact [permissions@ersnet.org](mailto:permissions@ersnet.org)

This article has an editorial commentary:

<https://doi.org/10.1183/13993003.01977-2022>

Received: 21 May 2022  
Accepted: 24 July 2022

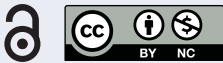

almost exclusively studied in European and North American populations. This study investigated the risk factors for poor outcome in a large population of bronchiectasis patients enrolled in India.

**Methods** The European Multicentre Bronchiectasis Audit and Research Collaboration (EMBARC) and Respiratory Research Network of India (EMBARC-India) registry is a prospective observational study of adults with computed tomography-confirmed bronchiectasis enrolled at 31 sites across India. Baseline characteristics of patients were used to investigate associations with key clinical outcomes: mortality, severe exacerbations requiring hospital admission, overall exacerbation frequency and decline in forced expiratory volume in 1 s.

**Results** 1018 patients with at least 12-month follow-up data were enrolled in the follow-up study. Frequent exacerbations ( $\geq 3$  per year) at baseline were associated with an increased risk of mortality (hazard ratio (HR) 3.23, 95% CI 1.39–7.50), severe exacerbations (HR 2.71, 95% CI 1.92–3.83), future exacerbations (incidence rate ratio (IRR) 3.08, 95% CI 2.36–4.01) and lung function decline. Coexisting COPD, dyspnoea and current cigarette smoking were similarly associated with a worse outcome across all end-points studied. Additional predictors of mortality and severe exacerbations were increasing age and cardiovascular comorbidity. Infection with Gram-negative pathogens (predominantly *Klebsiella pneumoniae*) was independently associated with increased mortality (HR 3.13, 95% CI 1.62–6.06), while *Pseudomonas aeruginosa* infection was associated with severe exacerbations (HR 1.41, 95% CI 1.01–1.97) and overall exacerbation rate (IRR 1.47, 95% CI 1.13–1.91).

**Conclusions** This study identifies risk factors for morbidity and mortality among bronchiectasis patients in India. Identification of these risk factors may support treatment approaches optimised to an Asian setting.
